# Supplementary material for: Genome-scale metabolic modeling underscores the potential of Cutaneotrichosporon oleaginosus ATCC 20509 as a cell factory for biofuel production
Source: Biotechnol Biofuels. 2021 Jan 6;14:2. doi: 10.1186/s13068-020-01838-1 (PMC7788717; doi:10.1186/s13068-020-01838-1)
Supplement: Supplementary file 6 — Additional file 6. Biomass component at glucose and unlimited nitrogen condition. [file 13068_2020_1838_MOESM6_ESM.xlsx]

## Sheet: DNA and RNA
Nucleotide composition
DNA composition	% (mol/mol) [h]	MW (g/mol) [g]					3.372 ATP + 0.297 dCMP + 0.297 dGMP + 0.203 dAMP + 0.203 dTMP + 3.372 H2O -> 3.372 H + 3.372 ADP + 3.372 Phosphate + DNA
dAMP	20.295	331.225
dTMP	20.295	322.21
dCMP	29.705	307.199
dGMP	29.705	347.224
average DNA		s
[h] obtain for a 59.41% GC content in C.curvatus genome
[g] Molecular weights of components are from PubChem (https://pubchem.ncbi.nlm.nih.gov/)
RNA composition	% (mol/mol) [m]	MW [g]					2.4 ATP + 0.2 CMP + 0.262 AMP + 0.216 UMP + 0.322 GMP + 2.4 H2O -> 2.4 H + 2.4 ADP + 2.4 Phosphate + RNA
AMP	26.2	347.224
TMP	21.6	324.182
CMP	20	323.198
GMP	32.2	363.223					Energy requirement for polymerization of macromolecules
[m] Based on E. coli							Process	Energy required [o]
							Protein synthesis and processing	4.306 mmol ATP / mmol amino acid
							RNA synthesis and processing	0.4 mmol ATP / mmol RNA [p] (2.4 mmol ATP/ mmol RNA)
							DNA synthesis and processing	1.372 mmol ATP / mmol DNA [p] (3.372 mmol ATP / mmol DNA)
							[o] Wilkins BM, Pritchard RH. Escherichia coli and Salmonella typhimurium - Cellular and Molecular-Biology, Vol 1-2 - Neidhardt,Fc. Nature. 1987;330(6150):707-8.
							[p] DNA assembly reaction can be simply described as DNAn + dNMP -> DNAn+1, where dNMP represents a deoxyribonucleotide monophosphate. However, as DNA synthesis takes deoxyribonucleotide triphosphates as precursors, DNA assembly costs an additional 2 mol ATP per mol DNA.

## Sheet: Fatty acid and Lipid
Lipid composition
Lipid composition	% (w/w)	Molecular weight (g/mol) **	Coeff
TAG (C6H5O6R3) ( RCO2CH2CH(O2CR′)CH2CO2R″)	90	399.1	2.25507
PE (C7O8PH12NR2) (RCO2CH2CH(O2CR′)CH2 PO4CH2CH2NH3 http://www.lipidhome.co.uk/lipids/complex/pe/index.htm	7	495.15	0.141371
PC (C10H12O8NPR2) (RCO2CH2CH(O2CR′)CH2 PO4CH2CH2N(CH3)3	3	531.18	0.056478
Average MW of lipid (sum/3)		475.14
**Molecular weight was calculated from the elementary composition. To account for the acyl molecular weight, an average MW of fatty acids was considered: MW(fatty acids without a –COOH group) R = average Mwfa - 45 = 226
Lipid fatty acyl-coA composition	% (w/w) [N abundant [n]]	% (w/w) [N deletion [n]]	% w/w [l]	MW (g/mol) [f]	Coeff N abundant [n]	Coeff N deletion [n]	Coeff [l]
Hexadecanoic (palmitic) acid (C16:0) coA	19.7	15.2	25	1001.92	0.196623	0.151709	0.249522
C18:0 coA stearoyl-CoA	18.2	19.7	10	1034	0.176015	0.190522	0.0967116
Octadecanoic (oleic) acid (C18:1) coA	48.8	47.2	57	1031.99	0.472875	0.457371	0.552333
C18:2 coA	13.3	17.8	7	1029.97	0.12913	0.172821	0.0679631
[d] https://pubchem.ncbi.nlm.nih.gov/compound/Oleoyl-coenzyme_A
[f] from pubchem
[k] https://pubchem.ncbi.nlm.nih.gov/compound/linoleoyl-CoA#section=Top
[n] Experimental data in our study. N+ (N-) when grow on glycerol
[l] Data from Ratledge and Wynn 2002 in Beopoulos et al., 2011 when grow on glucose

## Sheet: Protein
Amino acid	Molecular weight (without tRNA) (from Pubchem)	molecular coefficient (from iNL895)	molecular coefficient for 1 mol protein
Ala-tRNA(Ala) [cytoplasm]	89.1	0.3573	0.0992224	8.84072
Arg-tRNA(Arg) [cytoplasm]	174.2	0.1358	0.0377117	6.56939
Asn-tRNA(Asn) [cytoplasm]	132.1	0.1715	0.0476257	6.29135
Asp-tRNA(Asp) [cytoplasm]	133.1	0.1715	0.0476257	6.33898
Cys-tRNA(Cys) [cytoplasm]	121.2	0.0429	0.0119134	1.4439
Gln-tRNA(Gln) [cytoplasm]	146.1	0.268	0.0744238	10.8733
Glu-tRNA(Glu) [cytoplasm]	147.1	0.268	0.0744238	10.9477
Gly-tRNA(Gly) [cytoplasm]	75.1	1e-06	2.77701e-07	2.08553e-05
L-glycine [cytoplasm]	75.1	0.3252	0.0903082	6.78215
His-tRNA(His) [cytoplasm]	155.2	0.075	0.0208275	3.23244
Leu-tRNA(Leu) [cytoplasm]	131.2	0.2501	0.0694529	9.11222
Lys-tRNA(Lys) [cytoplasm]	146.2	0.2394	0.0664815	9.7196
Met-tRNA(Met) [cytoplasm]	149.2	0.05	0.013885	2.07165
Phe-tRNA(Phe) [cytoplasm]	165.2	0.1143	0.0317412	5.24364
Pro-tRNA(Pro) [cytoplasm]	115.1	0.1286	0.0357123	4.11049
Ser-tRNA(Ser) [cytoplasm]	105.1	0.2537	0.0704527	7.40457
Thr-tRNA(Thr) [cytoplasm]	119.1	0.1965	0.0545682	6.49907
Tyr-tRNA(Tyr) [cytoplasm]	181.2	0.0965	0.0267981	4.85582
Val-tRNA(Val) [cytoplasm]	117.1	0.2573	0.0714524	8.36707
Ile-tRNA(Ile) [cytoplasm]	131.2	0.1715	0.0476257	6.24849
Trp-tRNA(Trp) [cytoplasm]	204.2	0.028	0.00777562	1.58778
		3.6011	average protein molecular weight	126.54

## Sheet: Biomass reactions
In Nitrogen abundant condition						In Nitrogen depletion condition
Biomass component	% w/w	Molecular weight (g/mole)	mmol component / 1g DCW			Biomass component	% w/w	Molecular weight (g/mole)	mmol component / 1g DCW
Protein	38	126	3.01587			Protein	20	126	1.5873
Lipid	22	475.14	0.463021			Lipid	64	475.14	1.34697
DNA	0.3	326.9	0.00917712			DNA	0.3	326.9	0.00917712
RNA	2.7	342.59	0.0788114			RNA	2.7	342.59	0.0788114
Carbohydrate	34	1465.8	0.231955			Carbohydrate	11	1465.8	0.0750443
Require ATP for biomass formation (from iNL895 model which took value from Ecoli)		59.276
